# Supplementary material for: Pyroclastic Dust from Arequipa-Peru Decorated with Iron Oxide Nanoparticles and Their Ecotoxicological Properties in Water Flea D. magna
Source: MDPI journal article supplement (doi:10.3390/nano14090785), 2024-04-30
Supplement: s1 [file s1]

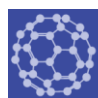

# Supplementary material for Pyroclastic Dust from Arequipa-Peru decorated with iron oxide nanoparticles and their ecotoxicological properties in water flea *D. magna*

Juan A. Ramos-Guivar <sup>1\*</sup>, Yacu V. Alca-Ramos<sup>1</sup>, Erich V. Manrique-Castillo<sup>1</sup>, F. Mendoza-Villa<sup>1</sup>, Noemi-Raquel Checca-Huaman<sup>2</sup>, Renzo Rueda-Vellasmin<sup>1,3</sup>, Edson C. Passamani<sup>3</sup>

Grupo de Investigación de Nanotecnología Aplicada para Biorremediación Ambiental, Energía, Biomedicina y Agricultura (NANOTECH), Facultad de Ciencias Físicas, Universidad Nacional Mayor de San Marcos, Av. Venezuela Cdra 34 S/N, Ciudad Universitaria, Lima 15081, Perú

<sup>2</sup> Centro Brasileiro de Pesquisas Físicas (CBPF), R. Xavier Sigaud, 150, Urca, Rio de Janeiro 22290-180, Brazil

<sup>3</sup> Physics Department, Federal University of Espírito Santo, Vitória 29075-910, Brazil

\* Correspondence: juan.ramos5@unmsm.edu.pe

According to Section 2 (Figure 2), the Sillar sample has four identified phases, which are shown in Table S1. To determine the  $D$  value of each phase, we proceeded using the Equation (1), but before we identified the corresponding contribution of each such phase and calculated the  $\beta_{inst}$  using the relation S1:

$$\beta_{inst} = 0.253 - 0.002 \times (2\theta) + 3.7 \times 10^{-5}(2\theta) \quad (S1)$$

**Table S1.** Profile broadening parameters used to find the size of the Sillar sample crystallites.

| Phase | $2\theta^\circ$ | $\cos(\theta)$ | $\beta_{meas}$ | $\beta_{inst}$ | $\beta_D$ | $D$ (nm) |
|-------|-----------------|----------------|----------------|----------------|-----------|----------|
| Al    | 13.64           | 0.992          | 0.006          | 0.252          | 0.004     | 32       |
| C     | 21.86           | 0.981          | 0.005          | 0.252          | 0.003     | 46       |
| C     | 23.54           | 0.978          | 0.005          | 0.252          | 0.002     | 50       |
| Al    | 27.73           | 0.970          | 0.012          | 0.252          | 0.011     | 12       |
| S     | 29.81           | 0.966          | 0.004          | 0.252          | 0.002     | 67       |
| An    | 30.16           | 0.965          | 0.004          | 0.252          | 0.001     | 144      |
| An    | 30.70           | 0.964          | 0.007          | 0.252          | 0.005     | 26       |
| S     | 31.29           | 0.962          | 0.004          | 0.252          | 0.001     | 102      |
| S     | 34.76           | 0.954          | 0.007          | 0.252          | 0.006     | 24       |
| An    | 35.95           | 0.951          | 0.009          | 0.252          | 0.008     | 19       |

Table S2 shows the crystallite sizes of the MS sample, for which we identified the relative contributions of each phase, with  $\gamma\text{-Fe}_2\text{O}_3$  overlapping the Sillar phases.

**Table S2.** Corresponding profile broadening parameters used to find the size of the MS sample where the label M means the  $\gamma\text{-Fe}_2\text{O}_3$  contribution peaks.

| Phase | $2\theta^\circ$ | $\cos(\theta)$ | $\beta_{meas}$ | $\beta_{inst}$ | $\beta_D$ | $D$ (nm) |
|-------|-----------------|----------------|----------------|----------------|-----------|----------|
| Al    | 13.46           | 0.993          | 0.040          | 0.252          | 0.040     | 4        |
| M     | 18.32           | 0.987          | 0.022          | 0.252          | 0.022     | 7        |

|    |       |       |       |       |       |    |
|----|-------|-------|-------|-------|-------|----|
| C  | 21.87 | 0.981 | 0.006 | 0.252 | 0.004 | 32 |
| C  | 23.58 | 0.978 | 0.009 | 0.252 | 0.008 | 17 |
| Al | 27.79 | 0.970 | 0.011 | 0.252 | 0.010 | 14 |
| M  | 30.25 | 0.965 | 0.016 | 0.252 | 0.015 | 10 |
| M  | 35.63 | 0.952 | 0.014 | 0.252 | 0.014 | 11 |
| M  | 43.16 | 0.929 | 0.016 | 0.252 | 0.015 | 10 |
| M  | 57.22 | 0.877 | 0.012 | 0.252 | 0.011 | 14 |
| M  | 62.88 | 0.853 | 0.014 | 0.251 | 0.013 | 13 |

**Table S3.** Hyperfine magnetic parameters obtained from the fit of the  $^{57}\text{Fe}$  Mössbauer spectrum recorded at 300 K for the MS sample. QS indicates the quadrupolar splitting and  $\epsilon$  the quadrupolar shifting, W is the Lorentzian line width, R.A.A. is the relative absorption area, CS relates the center shift values,  $\sigma$  is the width of the Gaussian distribution of  $B_{\text{hf}}$ , and  $B_{\text{hf}}$  is the mean hyperfine magnetic field.

|         | R.A.A. (%) | CS (vs Fe)<br>(mm/s) | $B_{\text{hf}}$ (T) | $\sigma$ (T) | $\epsilon$ or QS<br>(mm/s) | W (mm/s) |
|---------|------------|----------------------|---------------------|--------------|----------------------------|----------|
| I,A     | 20(2)      | 0.20(1)              | 47.7(1)             | 1.2(1)       | 0.00(2)                    | 0.37(1)  |
| I,B     | 30(2)      | 0.41(1)              | 47.7(1)             | 1.8(1)       | 0.00(2)                    | 0.37(1)  |
| II,A    | 17(2)      | 0.22(1)              | 42.0(1)             | 4.5(2)       | 0.00(2)                    | 0.37(1)  |
| II,B    | 28(2)      | 0.43(1)              | 42.0(1)             | 4.5(2)       | 0.00(2)                    | 0.37(1)  |
| doublet | 5(2)       | 0.32(4)              | -                   | -            | 0.78(7)                    | 0.37(4)  |

**Table S4.** Hyperfine magnetic parameters obtained from the fit of the  $^{57}\text{Fe}$  Mössbauer spectrum recorded at 15 K for the MS sample. The quadrupolar shifting ( $\epsilon$ ) was taken as 0 and the Lorentzian line width was fixed to 0.24,  $\Gamma$  is the line width (mm/s), R.A.A. is the relative absorption area, CS relates the center shift values, and  $B_{\text{hf}}$  is the mean hyperfine magnetic field.

|   | R.A.A.<br>(%) | CS (vs Fe)<br>(mm/s) | $B_{\text{hf}}$ (T) | $\Gamma$ (mm/s) |
|---|---------------|----------------------|---------------------|-----------------|
| A | 37(2)         | 0.39 (2)             | 51.0 (2)            | 0.34(1)         |
| B | 63(2)         | 0.47 (2)             | 52.8 (2)            | 0.35(1)         |
